# Supplementary material for: Potential oxygen consumption and community composition of sediment bacteria in a seasonally hypoxic enclosed bay
Source: PeerJ journal article supplement (doi:10.7717/peerj.11836), 2021-08-10

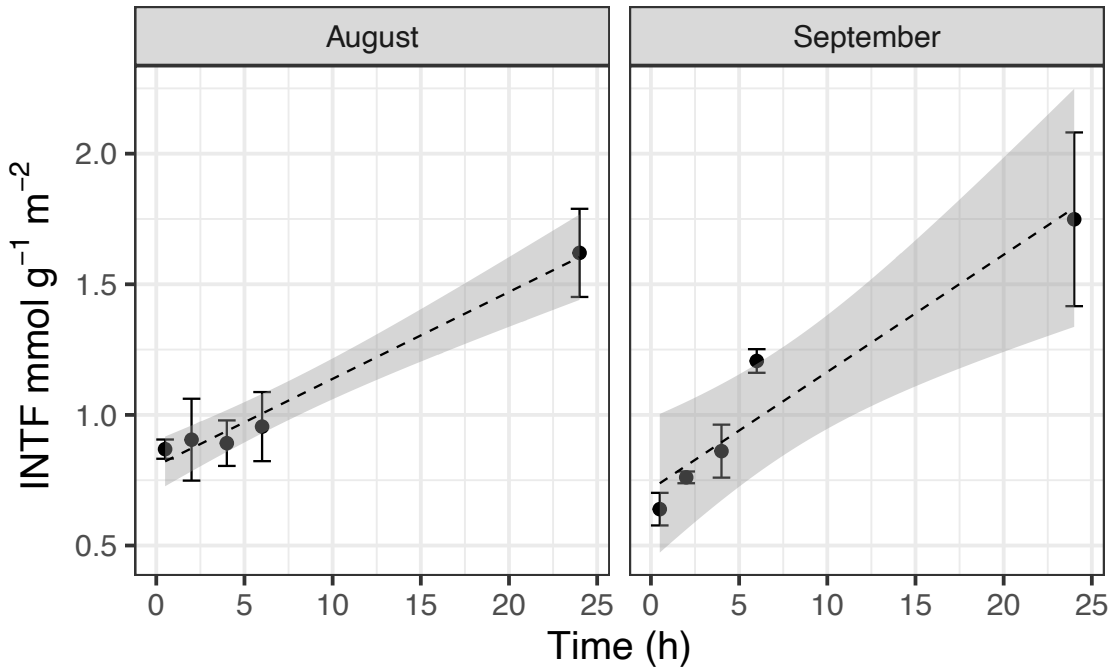

Supplement: Supp_FigS1.pdf [file Supp_FigS1.pdf]
