# Supplementary material for: Potential oxygen consumption and community composition of sediment bacteria in a seasonally hypoxic enclosed bay
Source: PeerJ. 2021 Aug 10;9:e11836. doi: 10.7717/peerj.11836 (PMC8362671; doi:10.7717/peerj.11836)
Supplement: Supplemental Information 4 [file peerj-09-11836-s004.xlsx]

## Sheet: Table S1
Pre-incubation time (h)	Aeration time (h)	Sample	Type	O2 consumption rate (µmol g-1 day-1)	Range of O2 consumption rate	INT reduction rate (µmol g-1 day-1)	Standard error of INT reduction rate	Standard error of O2 consumption rate	Sample number for O2 consumption measurement	Sample number for INT reduction measurement
20	0.5	2017_August	WOC	104	4.6	15.3	1.3	NA	2	3
20	1	2017_August	WOC	148.4	1.2	15.3	0.9	NA	2	3
20	24	2017_August	WOC	75.2	1.5	10.1	0.3	NA	2	3
20	4.5	2017_August	WOC	88.4	1.1	7.8	0.9	NA	2	3
20	2	2017_August	WOC	96.5	15	10.8	0.9	NA	2	3
20	48	2017_August	WOC	68.6	10	10.2	0.5	NA	2	3
20	4	2017_August	WOC	61.8	0	7.4	0.2	NA	2	3
20	0	2020_August	WOC	155.2	78.3	28.5	1.2	NA	2	3
0	3	2020_August	WOC	390.5	166.5	27.8	1.2	NA	2	3
20	2.5	2020_August	WOC	326.7	57.3	24.4	0.7	NA	2	3
20	6.5	2020_August	WOC	532.9*	37.7	9.7	0.4	NA	2	3
20	0.25	2020_August	WOC	288.7	33	23.3	0.4	NA	2	3
20	44	2020_August	WOC	63.2	4.1	13.1	0.6	NA	2	3
0	5	2020_August	WOC	198.5	21.8	16.6	1.6	NA	2	3
20	39	2020_August	WOC	55.9	1.9	11.5	0.4	NA	2	3
20	17	2020_August	WOC	44.3	0.7	12.9	1.9	NA	2	3
0	18	2020_August	WOC	47.7	2.6	18.5	1.3	NA	2	3
20	0.5	2017_August	COC	42.4	1	2.1	0.1	NA	2	3
20	1	2017_August	COC	54.2	0.3	3	0.4	NA	2	3
20	24	2017_August	COC	47.4	3.5	0.6	0	NA	2	3
20	4.5	2017_August	COC	50.7	5	2.5	0.7	NA	2	3
20	2	2017_August	COC	52	0.4	2.4	0.2	NA	2	3
20	48	2017_August	COC	54.1	6.6	1.8	0.6	NA	2	3
20	4	2017_August	COC	59.6	7.8	2	0.1	NA	2	3
20	0	2020_August	COC	144.5	0.4	21.7	4.2	NA	2	3
0	3	2020_August	COC	124.7	15.7	25.6	0.6	NA	2	3
20	2.5	2020_August	COC	132.8	5.6	18.8	0.7	NA	2	3
20	6.5	2020_August	COC	62.4	6.8	5.8	0.4	NA	2	3
20	0.25	2020_August	COC	147.1	17.9	22.7	1.6	NA	2	3
20	44	2020_August	COC	56.1	2.1	2.8	0.3	NA	2	3
0	5	2020_August	COC	87.8	13.4	8.9	0.6	NA	2	3
20	39	2020_August	COC	38.8	2	5.1	2.2	NA	2	3
20	17	2020_August	COC	69.9	18.8	4.8	0.4	NA	2	3
0	18	2020_August	COC	74.8	6.9	8.6	0.1	NA	2	3
0	0	2017_August	COC	80.9	19.8	4.3	3.5	6.3	3	3
0	0.25	2017_August	COC	72.2	23.7	16.5	1.3	7.6	3	3
0	0.5	2017_August	COC	55.5	2.9	9	0.3	0.8	3	3
0	2	2017_August	COC	62.1	2.7	5.6	0.1	0.9	3	3
0	4	2017_August	COC	52.2	2.7	3.2	0.2	0.8	3	3
0	7	2017_August	COC	61.7	4.2	3.7	0.1	1.4	3	3
0	24	2017_August	COC	61.7	0.6	2.3	0.2	0.2	3	3
0	0	2017_August	COC	82.9	6	12.9	0.3	1.9	3	3
NA: not applicable.
*; The value treated as outlier.
