# Supplementary material for: Potential oxygen consumption and community composition of sediment bacteria in a seasonally hypoxic enclosed bay
Source: PeerJ. 2021 Aug 10;9:e11836. doi: 10.7717/peerj.11836 (PMC8362671; doi:10.7717/peerj.11836)
Supplement: Supplemental Information 5 [file peerj-09-11836-s005.xlsx]

## Sheet: Table S1
	In situ sediment samples						At the end of incubation
ASVs	2021-05-19	2021-06-20	2021-07-18	2021-08-24	2021-09-20		2021-05-19	2021-06-20	2021-07-18	2021-08-24	2021-09-20
ASV_31	0	0	0	0.009	0.106		0	0	0	4.622	0.89
ASV_49	0	0	0	0.068	0.262		0	0	0	2.788	0.685
ASV_91	0	0.013	0.023	0.009	0.003		0.538	2.191	0.837	0.008	0.008
ASV_93	0	0	0	0.036	0.044		0	0	0	2.723	0.31
ASV_231	0.004	0	0	0.015	0.082		0	0	0	1.149	0.4
ASV_407	0	0	0	0.408	0.015		0	0	0	0.033	0.016
ASV_409	0.149	0.126	0.014	0.009	0		0.427	0.099	0.021	0.008	0.008
ASV_666	0	0	0	0.006	0		0	0	0	0.783	0
ASV_857	0	0	0	0	0		0	0.233	0.565	0	0
ASV_876	0	0	0	0	0		0.009	0.691	0	0.008	0
ASV_900	0	0	0	0.182	0.009		0	0	0	0.106	0
ASV_1023	0.004	0.003	0	0.021	0.026		0	0	0	0.342	0.073
ASV_1295	0	0	0	0.104	0.012		0	0.009	0	0.098	0.016
ASV_1377	0.004	0.013	0.005	0.009	0		0.248	0.117	0	0	0
ASV_1492	0	0	0.009	0.006	0		0.009	0.242	0.157	0	0
ASV_1851	0	0	0	0	0.053		0	0	0	0.024	0.131
ASV_1955	0.008	0	0	0	0.038		0	0	0	0.073	0.082
ASV_2308	0.004	0	0	0.042	0		0	0.045	0	0.057	0
ASV_2522	0.012	0.003	0	0	0		0.077	0.09	0	0	0
ASV_2621	0	0	0	0.003	0.018		0	0	0	0.041	0.082
ASV_2888	0	0	0	0.003	0.015		0	0	0	0.008	0.09
ASV_3064	0.008	0.017	0	0	0		0	0.054	0.021	0	0
Total	0.193	0.175	0.05	0.929	0.683		1.306	3.772	1.601	12.871	2.791
